# Supplementary material
Source: PubMed Central journal article supplement (PMC2718804)
Supplement: jlb.0907636_1.pdf [file jlb.0907636_1.pdf]

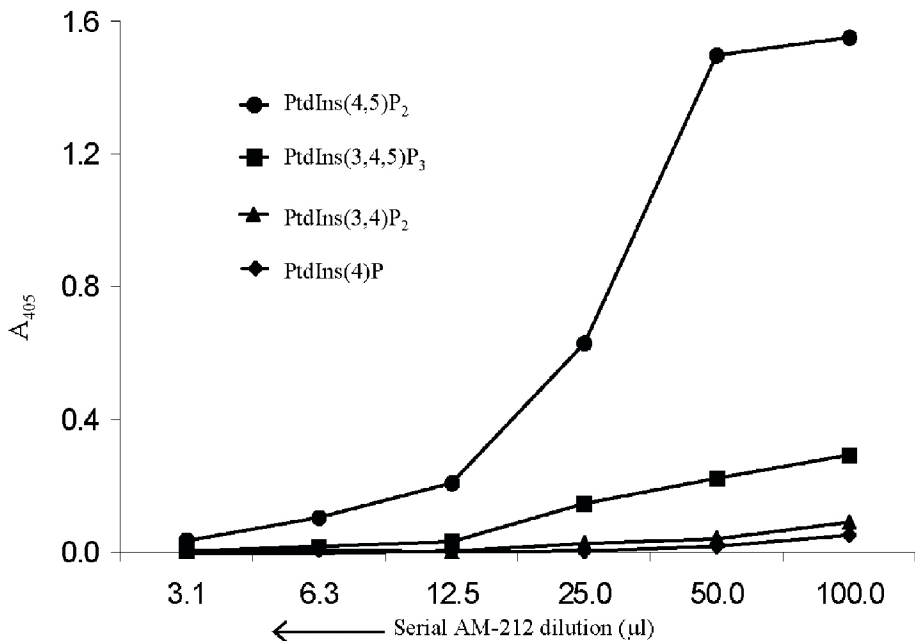

**Figure S1.** Enzyme-linked immunosorbent assay (ELISA) shows AM-212 antibody specificity toward PtdIns(4,5) $P_2$ . A 96-well polystyrene microtiter plate was coated with the following four phospholipids: PtdIns(4,5) $P_2$ , PtdIns(3,4,5) $P_3$ , PtdIns(3,4) $P_2$  and PtdIns(4)P. The detection of antibody-antigen interaction using ELISA was done as described in the materials and methods. AM-212 antibody shows strong reactivity with PtdIns(4,5) $P_2$  with slight cross-reactivity with PtdIns(3,4,5) $P_3$ . Data is representative of 3 independent experiments.

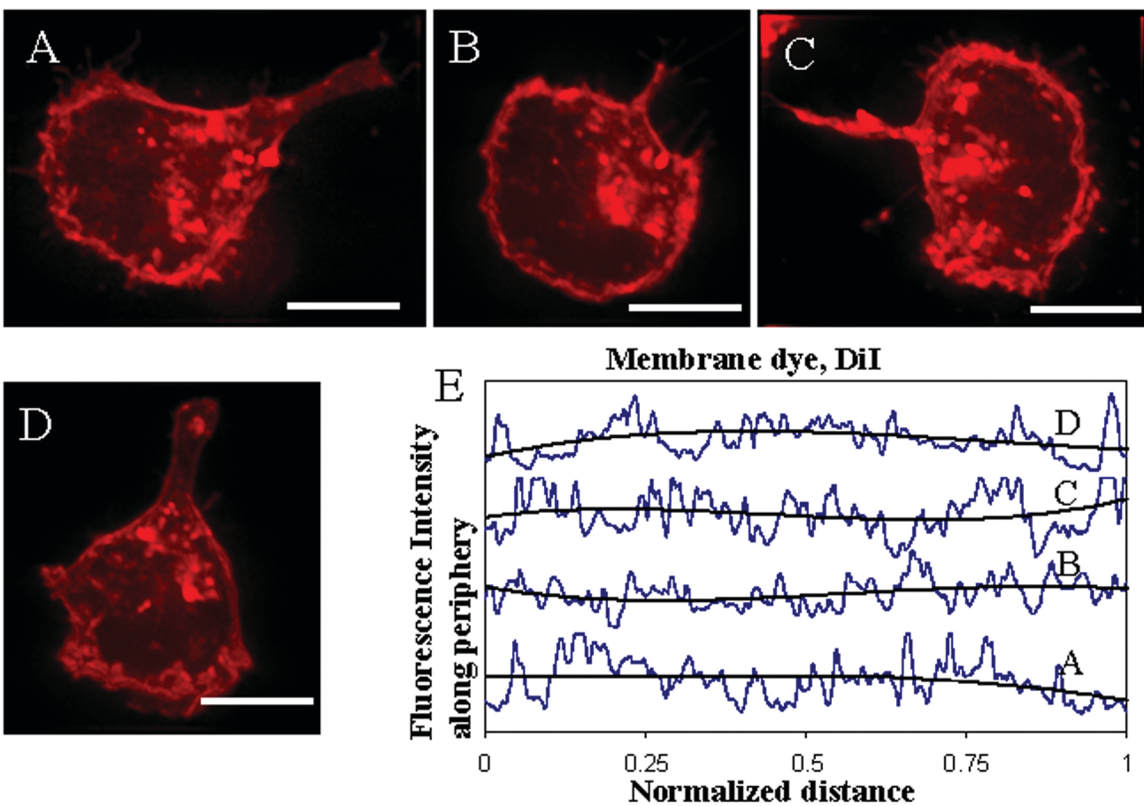

**Figure S2.** Plasma membrane staining of differentiated HL-60 cells with membrane dye, DiI. Four representative cells of DiI staining in fMLP stimulated HL-60 cells (A,B,C,D) and the corresponding fluorescence intensity profiles along the periphery (E). Trend of the intensity profile is shown by thick black line (E). Scale bar, 5  $\mu\text{m}$ .

**Movie S3. HL-60 cells polarize and chemotax under fMLP gradient. Differentiated HL-60 cells were plated on fibronectin matrix and stimulated in a gradient fashion by delivering 10  $\mu$ M fMLP through a micropipette fitted with an Eppendorf femtotip II. Cells form classical front-back morphological polarity and move toward the pipette tip (top right).**
